# Supplementary material for: Comparison of Eight Commercially Available Faecal Point-of-Care Tests for Detection of Canine Parvovirus Antigen
Source: MDPI journal article supplement (doi:10.3390/v13102080), 2021-10-15
Supplement: s1 [file s1]

# Supplementary material

**Table S1.** Age and vaccination status of the 150 dogs, results of eight point-of-care tests, real-time polymerase chain reaction (incl. virus load/g faeces) and virus culture for detection of canine parvovirus of 150 faecal samples (three groups; group H: healthy dogs, group S: shelter dogs, group p: dogs with suspicion of parvovirus).

| #  | Age (in years) | Vac. status      | Group | Snap® Parvo (POCT-A) | Fassisi® Parvo (POCT-B) | Primag-nost® Parvo H + K (POCT-C) | FASTest® PARVO Card (POCT-D) | Vetexpert Rapid Test CPV Ag® (POCT-E) | Anigen CPV Ag Test Kit® (POCT-F) | Rapid ImmunoRun® Parvovirus Antigen Detection Kit (POCT-G) | WIT-NESS® Parvo (POCT-H) | qPCR | Virus load/g faeces | Virus culture |
|----|----------------|------------------|-------|----------------------|-------------------------|-----------------------------------|------------------------------|---------------------------------------|----------------------------------|------------------------------------------------------------|--------------------------|------|---------------------|---------------|
| 1  | 12             | not last 4 weeks | S     | -                    | -                       | -                                 | -                            | -                                     | -                                | -                                                          | -                        | +    | 2,15E+06            | -             |
| 2  | 8              | not last 4 weeks | S     | -                    | -                       | -                                 | -                            | -                                     | -                                | -                                                          | -                        | -    | -                   | -             |
| 3  | 9              | not last 4 weeks | S     | -                    | -                       | -                                 | -                            | -                                     | -                                | -                                                          | -                        | +    | 1,19E+06            | -             |
| 4  | 9              | not last 4 weeks | S     | -                    | -                       | -                                 | -                            | -                                     | -                                | -                                                          | -                        | -    | -                   | -             |
| 5  | 12             | not last 4 weeks | S     | -                    | -                       | -                                 | -                            | -                                     | -                                | -                                                          | -                        | -    | -                   | -             |
| 6  | 12             | not last 4 weeks | S     | -                    | -                       | -                                 | -                            | -                                     | -                                | -                                                          | -                        | +    | 2,17E+06            | -             |
| 7  | 4              | not last 4 weeks | S     | -                    | -                       | -                                 | -                            | -                                     | -                                | -                                                          | -                        | -    | -                   | -             |
| 8  | 3              | not last 4 weeks | S     | -                    | -                       | -                                 | -                            | -                                     | -                                | -                                                          | -                        | -    | -                   | -             |
| 9  | 9              | not last 4 weeks | S     | -                    | -                       | -                                 | -                            | -                                     | -                                | -                                                          | -                        | -    | -                   | -             |
| 10 | 5              | not last 4 weeks | S     | -                    | -                       | -                                 | -                            | -                                     | -                                | -                                                          | -                        | -    | -                   | -             |
| 11 | 7              | not last 4 weeks | S     | -                    | -                       | -                                 | -                            | -                                     | -                                | -                                                          | -                        | -    | -                   | -             |
| 12 | 10             | not last 4 weeks | S     | -                    | -                       | -                                 | -                            | -                                     | -                                | -                                                          | -                        | +    | 4,65E+06            | -             |
| 13 | 4              | not last 4 weeks | S     | -                    | -                       | -                                 | -                            | -                                     | -                                | -                                                          | -                        | -    | -                   | -             |
| 14 | 4              | not last 4 weeks | S     | -                    | -                       | -                                 | -                            | -                                     | -                                | -                                                          | -                        | -    | -                   | -             |
| 15 | 9              | not last 4 weeks | S     | -                    | -                       | -                                 | -                            | -                                     | -                                | -                                                          | -                        | -    | -                   | -             |
| 16 | 4              | not last 4 weeks | S     | -                    | -                       | -                                 | -                            | -                                     | -                                | -                                                          | -                        | -    | -                   | -             |
| 17 | 5              | not last 4 weeks | S     | -                    | -                       | -                                 | -                            | -                                     | -                                | -                                                          | -                        | -    | -                   | -             |
| 18 | 11             | not last 4 weeks | S     | -                    | -                       | -                                 | -                            | -                                     | -                                | -                                                          | -                        | -    | -                   | -             |
| 19 | 0.9            | not last 4 weeks | S     | -                    | -                       | -                                 | -                            | -                                     | -                                | -                                                          | -                        | -    | -                   | -             |
| 20 | 6              | not last 4 weeks | S     | -                    | -                       | -                                 | -                            | -                                     | -                                | -                                                          | -                        | -    | -                   | -             |
| 21 | 10             | not last 4 weeks | S     | -                    | -                       | -                                 | -                            | -                                     | -                                | -                                                          | -                        | -    | -                   | -             |
| 22 | 4              | not last 4 weeks | S     | -                    | -                       | -                                 | -                            | -                                     | -                                | -                                                          | -                        | -    | -                   | -             |
| 23 | 0.8            | not last 4 weeks | S     | -                    | -                       | -                                 | -                            | -                                     | -                                | -                                                          | -                        | -    | -                   | -             |

[illegible]

[illegible]

| 78  | 9              | not last 4 weeks    | H     | -                    | -                       | -                                 | -                            | -                                     | -                                | -                                                          | -                        | -    | -                   | -             | - |
|-----|----------------|---------------------|-------|----------------------|-------------------------|-----------------------------------|------------------------------|---------------------------------------|----------------------------------|------------------------------------------------------------|--------------------------|------|---------------------|---------------|---|
| 79  | 4              | not last 4 weeks    | H     | -                    | -                       | -                                 | -                            | -                                     | -                                | -                                                          | -                        | -    | -                   | -             | - |
| 80  | 13             | not last 4 weeks    | H     | -                    | -                       | -                                 | -                            | -                                     | -                                | -                                                          | -                        | -    | -                   | -             | - |
| 81  | 3              | not last 4 weeks    | H     | -                    | -                       | -                                 | -                            | -                                     | -                                | -                                                          | -                        | -    | -                   | -             | - |
| 82  | 6              | not last 4 weeks    | H     | -                    | -                       | -                                 | -                            | -                                     | -                                | -                                                          | -                        | -    | -                   | -             | - |
| #   | Age (in years) | Vac. status         | Group | Snap® Parvo (POCT-A) | Fassisi® Parvo (POCT-B) | Primag-nost® Parvo H + K (POCT-C) | FASTest® PARVO Card (POCT-D) | Vetexpert Rapid Test CPV Ag® (POCT-E) | Anigen CPV Ag Test Kit® (POCT-F) | Rapid ImmunoRun® Parvovirus Antigen Detection Kit (POCT-G) | WIT-NESS® Parvo (POCT-H) | qPCR | Virus load/g faeces | Virus culture |   |
| 83  | 11             | not last 4 weeks    | H     | -                    | -                       | -                                 | -                            | -                                     | -                                | -                                                          | -                        | -    | -                   | -             | - |
| 84  | 5              | not last 4 weeks    | H     | -                    | -                       | -                                 | -                            | -                                     | -                                | -                                                          | -                        | -    | -                   | -             | - |
| 85  | 10             | not last 4 weeks    | H     | -                    | -                       | -                                 | -                            | -                                     | -                                | -                                                          | -                        | -    | -                   | -             | - |
| 86  | 2              | not last 4 weeks    | H     | -                    | -                       | -                                 | -                            | -                                     | -                                | -                                                          | -                        | -    | -                   | -             | - |
| 87  | 6              | not last 4 weeks    | H     | -                    | -                       | -                                 | -                            | -                                     | -                                | -                                                          | -                        | +    | 1,70E+06            | -             | - |
| 88  | 4              | not last 4 weeks    | H     | -                    | -                       | -                                 | -                            | -                                     | -                                | -                                                          | -                        | -    | -                   | -             | - |
| 89  | 9              | not last 4 weeks    | H     | -                    | -                       | -                                 | -                            | -                                     | -                                | -                                                          | -                        | +    | 2,60E+06            | -             | - |
| 90  | 6              | not last 4 weeks    | H     | -                    | -                       | -                                 | -                            | -                                     | -                                | -                                                          | -                        | +    | 2,83E+06            | -             | - |
| 91  | 1              | not last 4 weeks    | H     | -                    | -                       | -                                 | -                            | -                                     | -                                | -                                                          | -                        | -    | -                   | -             | - |
| 92  | 2              | not last 4 weeks    | H     | -                    | -                       | -                                 | -                            | -                                     | -                                | -                                                          | -                        | -    | -                   | -             | - |
| 93  | 6              | not last 4 weeks    | H     | -                    | -                       | -                                 | -                            | -                                     | -                                | -                                                          | -                        | -    | -                   | -             | - |
| 94  | 2              | not last 4 weeks    | H     | -                    | -                       | -                                 | -                            | -                                     | -                                | -                                                          | -                        | -    | -                   | -             | - |
| 95  | 6              | not last 4 weeks    | H     | -                    | -                       | -                                 | -                            | -                                     | -                                | -                                                          | -                        | -    | -                   | -             | - |
| 96  | 8              | not last 4 weeks    | H     | -                    | -                       | -                                 | -                            | -                                     | -                                | -                                                          | -                        | +    | 1,17E+06            | -             | - |
| #   | Age (in years) | Vac. status         | Group | Snap® Parvo (POCT-A) | Fassisi® Parvo (POCT-B) | Primag-nost® Parvo H + K (POCT-C) | FASTest® PARVO Card (POCT-D) | Vetexpert Rapid Test CPV Ag® (POCT-E) | Anigen CPV Ag Test Kit® (POCT-F) | Rapid ImmunoRun® Parvovirus Antigen Detection Kit (POCT-G) | WIT-NESS® Parvo (POCT-H) | qPCR | Virus load/g faeces | Virus culture |   |
| 97  | 9              | not last 4 weeks    | H     | -                    | -                       | -                                 | -                            | -                                     | -                                | -                                                          | -                        | +    | 1,32E+06            | -             | - |
| 98  | 6              | not last 4 weeks    | H     | -                    | -                       | -                                 | -                            | -                                     | -                                | -                                                          | -                        | +    | 4,05E+05            | -             | - |
| 99  | 4              | not last 4 weeks    | H     | -                    | -                       | -                                 | -                            | -                                     | -                                | -                                                          | -                        | -    | -                   | -             | - |
| 100 | 2              | not last 4 weeks    | H     | -                    | -                       | -                                 | -                            | -                                     | -                                | -                                                          | -                        | +    | 1,64E+06            | -             | - |
| 101 | 0.30           | 8 weeks<br>12 weeks | P     | -                    | -                       | -                                 | -                            | -                                     | -                                | -                                                          | -                        | +    | 3,38E+10            | -             | - |
| 102 | 0.19           | not vac.            | P     | -                    | -                       | -                                 | -                            | -                                     | -                                | -                                                          | -                        | +    | 8,86E+11            | -             | - |
| 103 | 0.25           | un-known            | P     | -                    | -                       | -                                 | -                            | -                                     | -                                | -                                                          | -                        | +    | 4,00E+13            | -             | - |
| 104 | 0.92           | 6 weeks<br>10 weeks | P     | -                    | -                       | -                                 | -                            | -                                     | -                                | -                                                          | -                        | +    | 2,62E+12            | -             | - |

|     |      |          |   |   |   |   |   |   |   |   |   |   |          |   |
|-----|------|----------|---|---|---|---|---|---|---|---|---|---|----------|---|
| 105 | 0.25 | 6 weeks  | P | - | - | - | - | - | - | - | - | + | 1,32E+14 | - |
| 106 | 0.25 | 8 weeks  | P | - | - | - | - | - | - | - | - | + | 2,71E+10 | - |
| 107 | 0.83 | un-known | P | - | - | - | - | - | - | - | - | + | 1,44E+13 | - |
| 108 | 0.33 | not vac. | P | - | - | - | - | - | - | - | - | + | 9,40E+07 | - |
| 109 | 0.19 | not vac. | P | + | + | + | + | + | + | + | + | + | 1,00E+14 | + |
| 110 | 0.58 | 7 weeks  | P | - | - | - | - | - | - | - | - | + | 1,45E+09 | - |
|     |      | 11 weeks |   |   |   |   |   |   |   |   |   |   |          |   |

| #   | Age (in years) | Vac. status | Group | Snap® Parvo (POCT-A) | Fassisi® Parvo (POCT-B) | Primag-nost® Parvo H + K (POCT-C) | FASTest® PARVO Card (POCT-D) | Vetexpert Rapid Test CPV Ag® (POCT-E) | Anigen CPV Ag Test Kit® (POCT-F) | Rapid Ag Test (POCT-G) | ImmunoRun® Parvovirus Antigen Detection Kit (POCT-H) | WIT-NESS® Parvo (POCT-I) | qPCR | Virus load/g faeces | Virus culture |
|-----|----------------|-------------|-------|----------------------|-------------------------|-----------------------------------|------------------------------|---------------------------------------|----------------------------------|------------------------|------------------------------------------------------|--------------------------|------|---------------------|---------------|
| 111 | 0.25           | un-known    | P     | -                    | -                       | -                                 | -                            | -                                     | +                                | -                      | -                                                    | +                        | +    | 1,41E+13            | -             |
| 112 | 0.33           | 12 weeks    | P     | +                    | +                       | +                                 | +                            | +                                     | +                                | +                      | +                                                    | +                        | +    | 1,21E+14            | +/-           |
| 113 | 0.42           | 8 weeks     | P     | -                    | -                       | -                                 | -                            | -                                     | -                                | -                      | -                                                    | -                        | +    | 2,64E+10            | -             |
| 114 | 0.17           | un-known    | P     | -                    | -                       | -                                 | -                            | -                                     | -                                | -                      | -                                                    | -                        | +    | 7,23E+07            | -             |
| 115 | 0.25           | un-known    | P     | +                    | -                       | +                                 | +                            | +                                     | +                                | +                      | +                                                    | +                        | +    | 3,32E+12            | +             |
| 116 | 0.92           | 10 weeks    | P     | -                    | -                       | -                                 | -                            | -                                     | -                                | -                      | -                                                    | -                        | +    | 8,53E+09            | -             |
| 117 | 0.58           | un-known    | P     | -                    | -                       | -                                 | -                            | -                                     | -                                | -                      | -                                                    | -                        | +    | 3,40E+10            | -             |
| 118 | 0.67           | 8 weeks     | P     | -                    | -                       | -                                 | -                            | -                                     | -                                | -                      | -                                                    | -                        | +    | 1,68E+06            | -             |
| 119 | 0.21           | not vac     | P     | -                    | -                       | -                                 | -                            | -                                     | -                                | -                      | -                                                    | -                        | +    | 1,47E+12            | -             |
| 120 | 0.67           | not vac     | P     | -                    | -                       | -                                 | -                            | -                                     | -                                | -                      | -                                                    | -                        | +    | 3,20E+07            | -             |
| 121 | 0.42           | not vac     | P     | +                    | -                       | -                                 | -                            | +                                     | +                                | +                      | +                                                    | -                        | +    | 1,45E+12            | -             |
| 122 | 0.15           | 6 weeks     | P     | +                    | +                       | +                                 | +                            | +                                     | +                                | +                      | +                                                    | +                        | +    | 9,88E+14            | -             |
| 123 | 0.19           | un-known    | P     | -                    | -                       | -                                 | -                            | +                                     | -                                | -                      | -                                                    | -                        | +    | 1,48E+09            | -             |
| 124 | 0.19           | un-known    | P     | -                    | -                       | -                                 | -                            | -                                     | -                                | -                      | -                                                    | -                        | +    | 1,50E+12            | -             |

| #   | Age (in years) | Vac. status | Group | Snap® Parvo (POCT-A) | Fassisi® Parvo (POCT-B) | Primag-nost® Parvo H + K (POCT-C) | FASTest® PARVO Card (POCT-D) | Vetexpert Rapid Test CPV Ag® (POCT-E) | Anigen CPV Ag Test Kit® (POCT-F) | Rapid Ag Test (POCT-G) | ImmunoRun® Parvovirus Antigen Detection Kit (POCT-H) | WIT-NESS® Parvo (POCT-I) | qPCR | Virus load/g faeces | Virus culture |
|-----|----------------|-------------|-------|----------------------|-------------------------|-----------------------------------|------------------------------|---------------------------------------|----------------------------------|------------------------|------------------------------------------------------|--------------------------|------|---------------------|---------------|
| 125 | 0.27           | 8 weeks     | P     | -                    | -                       | -                                 | -                            | -                                     | -                                | -                      | -                                                    | -                        | +    | 8,73E+12            | -             |
| 126 | 0.33           | un-known    | P     | +                    | +                       | +                                 | +                            | +                                     | +                                | +                      | +                                                    | +                        | +    | 2,85E+12            | +             |
| 127 | 0.15           | 4 weeks     | P     | +                    | +                       | +                                 | +                            | +                                     | +                                | +                      | +                                                    | +                        | +    | 2,94E+13            | +             |
| 128 | 0.08           | not vac.    | P     | +                    | +                       | +                                 | +                            | +                                     | +                                | +                      | +                                                    | +                        | +    | 7,27E+13            | +             |
| 129 | 0.10           | 4 weeks     | P     | +                    | +                       | +                                 | +                            | +                                     | +                                | +                      | +                                                    | +                        | +    | 5,43E+13            | +             |
| 130 | 2.00           | not vac.    | P     | +                    | +                       | +                                 | +                            | +                                     | +                                | +                      | +                                                    | +                        | +    | 1,76E+12            | +             |
| 131 | 0.50           | 6 weeks     | P     | +                    | +                       | +                                 | +                            | +                                     | +                                | +                      | +                                                    | +                        | +    | 7,45E+11            | +             |
| 132 | 0.25           | un-known    | P     | +                    | +                       | -                                 | -                            | +                                     | +                                | +                      | +                                                    | +                        | +    | 2,04E+13            | +             |
| 133 | 0.42           | 12 weeks    | P     | +                    | +                       | +                                 | +                            | +                                     | +                                | +                      | +                                                    | +                        | +    | 3,99E+12            | +             |
| 134 | 0.67           | 6 weeks     | P     | +                    | +                       | +                                 | +                            | +                                     | +                                | +                      | +                                                    | +                        | +    | 1,36E+12            | +             |
| 135 | 0.67           | un-known    | P     | +                    | +                       | +                                 | +                            | +                                     | +                                | +                      | +                                                    | +                        | +    | 1,80E+11            | +             |
| 136 | 1.67           | un-known    | P     | +                    | +                       | +                                 | +                            | +                                     | +                                | +                      | +                                                    | +                        | +    | 2,58E+12            | +             |
| 137 | 0.27           | 8 weeks     | P     | -                    | +                       | -                                 | -                            | +                                     | -                                | -                      | -                                                    | -                        | +    | 6,65E+09            | -             |
| 138 | 0.19           | un-known    | P     | -                    | -                       | -                                 | -                            | -                                     | -                                | -                      | -                                                    | -                        | +    | 3,85E+11            | -             |

| #   | Age (in years) | Vac. status | Group | Snap® Parvo (POCT-A) | Fassisi® Parvo (POCT-B) | Primag-nost® Parvo H + K (POCT-C) | FASTest® PARVO Card (POCT-D) | Vetexpert Rapid Test CPV Ag® (POCT-E) | Anigen CPV Ag Test Kit® (POCT-F) | Rapid ImmunoRun® Parvovirus Antigen Detection Kit (POCT-G) | WIT-NESS® Parvo (POCT-H) | qPCR | Virus load/g faeces | Virus culture |
|-----|----------------|-------------|-------|----------------------|-------------------------|-----------------------------------|------------------------------|---------------------------------------|----------------------------------|------------------------------------------------------------|--------------------------|------|---------------------|---------------|
| 139 | 0.58           | 8 weeks     | P     | +                    | +                       | +                                 | +                            | +                                     | +                                | +                                                          | +                        | +    | 3,43E+14            | +             |
| 140 | 0.15           | 12 weeks    | P     | +                    | +                       | +                                 | +                            | +                                     | +                                | +                                                          | +                        | +    | 4,21E+14            | +             |
| 141 | 0.33           | un-known    | P     | -                    | -                       | -                                 | -                            | -                                     | -                                | -                                                          | -                        | +    | 1,16E+10            | -             |
| 142 | 0.10           | un-known    | P     | -                    | -                       | -                                 | -                            | -                                     | -                                | -                                                          | -                        | +    | 5,00E+11            | -             |
| 143 | 0.10           | un-known    | P     | -                    | -                       | -                                 | -                            | -                                     | -                                | -                                                          | -                        | +    | 5,22E+10            | -             |
| 144 | 0.10           | un-known    | P     | +                    | +                       | -                                 | -                            | +                                     | +                                | +                                                          | +                        | +    | 1,25E+14            | -             |
| 145 | 0.15           | un-known    | P     | +                    | -                       | -                                 | -                            | +                                     | +                                | -                                                          | +                        | +    | 5,48E+13            | +             |
| 146 | 0.17           | un-known    | P     | +                    | -                       | -                                 | -                            | +                                     | +                                | +                                                          | -                        | +    | 3,96E+13            | -             |
| 147 | 0.27           | not vac.    | P     | +                    | -                       | +                                 | -                            | +                                     | +                                | +                                                          | +                        | +    | 8,00E+12            | -             |
| 148 | 0.15           | 6 weeks     | P     | -                    | -                       | -                                 | -                            | -                                     | -                                | -                                                          | -                        | +    | 1,90E+11            | +             |
| 149 | 0.15           | un-known    | P     | -                    | -                       | -                                 | -                            | -                                     | -                                | -                                                          | -                        | +    | 1,55E+11            | -             |
| 150 | 0.58           | un-known    | P     | -                    | -                       | -                                 | -                            | -                                     | -                                | -                                                          | -                        | -    | -                   | -             |

qPCR, real-time polymerase chain reaction, POCT, point-of-care test, Vac., vaccinated.
